# Supplementary material for: Contribution of Raman spectroscopy in nephrology: a candidate technique to detect hydroxyethyl starch of third generation in osmotic renal lesions
Source: Royal Society of Chemistry journal article supplement (doi:10.1039/c5an00821b), 2015-01-01

## Supplementary Data

**Figure S1:** Mean and standard-deviation Raman spectra of control (blue line) and HES-incubated (red line) monocytes

Figure S1

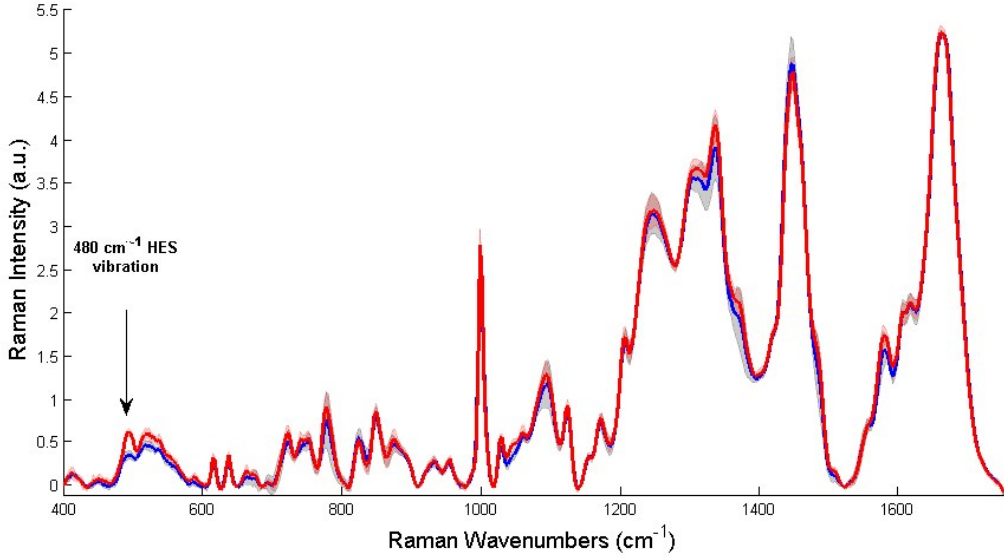

Supplement: c5an00821b1.pdf [file c5an00821b1.pdf]
